# Supplementary material for: D-MannosE to prevent Recurrent urinary tract InfecTions (MERIT): protocol for a randomised controlled trial
Source: PubMed Central journal article supplement (PMC7812098; doi:10.1136/bmjopen-2020-037128), 2021-01-13
Supplement: bmjopen-2020-037128supp001.pdf [file bmjopen-2020-037128supp001.pdf]

NUFFIELD DEPARTMENT OF  
**PRIMARY CARE**  
HEALTH SCIENCES

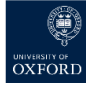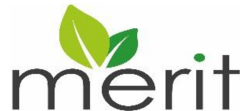

MERIT Informed Consent Form

Participant ID: \_\_\_\_\_ - \_\_\_\_\_

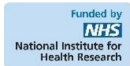

|   |                                                                                                                                                                                                                                                                                                                                                | PLEASE INITIAL |
|---|------------------------------------------------------------------------------------------------------------------------------------------------------------------------------------------------------------------------------------------------------------------------------------------------------------------------------------------------|----------------|
| 1 | I confirm I have read and understood the information sheet V____ dated ____ / ____ / ____ for the above study and have had the opportunity to ask questions and have these answered satisfactorily.                                                                                                                                            | ____           |
| 2 | I understand my participation is voluntary and that I am free to withdraw at any time, without giving any reason, and without my medical care or legal rights being affected.                                                                                                                                                                  | ____           |
| 3 | I understand that relevant sections of my medical notes and data collected during the study may be looked at by individuals from the University of Oxford, the relevant GP practice and from regulatory authorities, where it is relevant to my taking part in research. I give permission for these individuals to have access to my records. | ____           |
| 4 | I agree for my identifiable information to be stored securely for up to three months after the end of the study, and research documents with my personal information (i.e. this signed Consent Form) stored securely for five years after the end of the study.                                                                                | ____           |
| 5 | I agree to my General Practitioner being informed of my participation in the study, and being sent a copy of this signed Consent Form.                                                                                                                                                                                                         | ____           |
| 6 | I agree to donate urine samples, which will be frozen and stored for further analyses relating to this study. I consider these samples a gift to the University of Oxford and I understand I will not gain any direct personal or financial benefit from them.                                                                                 | ____           |
| 7 | I understand that I will be asked to complete questionnaires online using a website from the University of Oxford                                                                                                                                                                                                                              | ____           |
| 8 | I agree to take part in this study.                                                                                                                                                                                                                                                                                                            | ____           |

MERIT ICF V3.0 30.01.19

IRAS: 245539

REC: 18/SW/0245

1 of 2

NUFFIELD DEPARTMENT OF  
**PRIMARY CARE**  
HEALTH SCIENCES

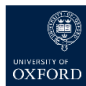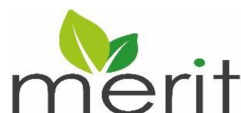

MERIT Informed Consent Form

Participant ID: \_\_\_\_\_ - \_\_\_\_\_

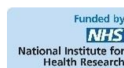

| <b>ADDITIONAL (optional, not required for study participation)</b>                                                                                                                                                                                                                                                     | <b>YES</b> | <b>NO</b> |
|------------------------------------------------------------------------------------------------------------------------------------------------------------------------------------------------------------------------------------------------------------------------------------------------------------------------|------------|-----------|
| <i>I agree to donate one perineal swab sample at the beginning of the study, which will be stored for further analyses relating to this study. I consider this sample a gift to the University of Oxford and I understand I will not gain any direct personal or financial benefit from this.</i>                      | ---        | ---       |
| <i>I agree to being contacted about the qualitative interviews in this trial</i>                                                                                                                                                                                                                                       | ---        | ---       |
| <i>I agree to be contacted about ethically approved research studies for which I may be suitable. I agree that my identifiable information will be stored securely for five years after the end of the study. I understand that agreeing to be contacted does not oblige me to participate in any further studies.</i> | ---        | ---       |
| <i>I agree for my de-identified urine samples to be used in future research, here or abroad, which has ethical approval. I understand this research may involve commercial organisations.</i>                                                                                                                          | ---        | ---       |

**Participant:**

Signed: \_\_\_\_\_ Name: \_\_\_\_\_ Date: \_\_/\_\_/\_\_\_\_

**Researcher:**

Signed: \_\_\_\_\_ Name: \_\_\_\_\_ Date: \_\_/\_\_/\_\_\_\_

MERIT ICF V3.0 30.01.19

IRAS: 245539

REC: 18/SW/0245

2 of 2
